# Supplementary material for: Modulation of biochemical and physiological parameters in Hordeum vulgare L. seedlings under the influence of benzyl-butyl phthalate
Source: PeerJ. 2019 Apr 19;7:e6742. doi: 10.7717/peerj.6742 (PMC6476287; doi:10.7717/peerj.6742)
Supplement: Data S1 [file peerj-07-6742-s001.xlsx]

## Sheet: Chl a
	Chl a		Conc.
	Conc.	Replicate	0	25	50	100	200	400	800	1600
		1	1.11742	1.35109	1.21214	1.05974	1.69293	1.08796	5.04224	4.55576
		2	1.05661	1.35991	1.20482	1.02777	1.20151	1.07526	5.04149	5.85654
		3	1.02583	1.3245	1.22559	1.12055	1.65558	1.07526	5.12651	4.69934
		4	0.71984	0.77602	0.8038	1.19869	1.36379	1.19944	3.00998	5.88401
		5	0.84534	0.75256	0.72447	1.26757	1.51125	1.20213	3.00654	5.93406
		6	0.68368	0.74061	0.75525	1.22215	1.30492	0.81976	2.96575	5.93794
		7	1.04854	1.17404	0.7926	1.06049	1.39307	2.36916	7.15608	5.02954
		8	1.08395	1.17016	0.87462	1.08783	1.47584	2.40457	7.16728	4.96216
		9	1.0974	1.19406	0.7418	1.09052	1.33226	2.52487	7.327	5.05031
		Mean	0.96429	1.09366	0.926121	1.12615	1.43679	1.52871	5.09365	5.3233
		SD	0.168649	0.263327	0.220352	0.083402	0.16258	0.688204	1.8294	0.572193
		SE	0.0562164	0.0877756	0.0734505	0.0278007	0.0541935	0.229401	0.609799	0.190731

## Sheet: Chl b
					Conc.
		0	25	50	100	200	400	800	1600
	1	0.72748	1.01382	0.95548	1.01164	1.41366	1.70232	2.17312	2.17712
	2	0.72798	0.8353	0.91436	0.87006	1.77002	1.707	2.28294	1.65396
	3	0.78314	0.82644	0.84098	1.01114	1.31788	1.707	2.07634	2.29948
	4	0.69872	0.6342	1.01832	1.06998	1.00914	0.96016	1.47604	2.45446
	5	0.87156	0.73048	0.76274	1.00078	1.30534	0.93726	1.60876	2.54556
	6	0.79968	0.62534	0.70758	0.9737	1.09656	2.02024	1.6457	2.7194
	7	0.79668	0.96952	0.80336	0.90182	1.17362	1.44928	2.79632	2.1778
	8	0.80554	0.79568	1.03604	0.97938	1.29648	1.45814	3.01128	2.02736
	9	0.69104	1.00596	0.82208	0.95648	1.17412	0.53746	2.99624	2.10442
	Mean	0.766869	0.826304	0.873438	0.974998	1.28409	1.38654	2.22964	2.23995
	SD	0.0593125	0.148088	0.114128	0.0602764	0.220716	0.477013	0.596206	0.313765
	SE	0.0197708	0.0493627	0.0380425	0.0200921	0.0735721	0.159004	0.198735	0.104588

## Sheet: Total Chl
					Conc.
		0	25	50	100	200	400	800	1600
	1	1.84438	2.36422	2.16698	2.07074	3.10566	2.78932	7.21352	6.73112
	2	1.78408	2.1946	2.11856	1.89726	2.97052	2.7813	7.32254	7.50876
	3	1.80844	2.15034	2.06598	2.13104	2.97258	2.7813	7.20104	6.99698
	4	1.41812	1.4098	1.82152	2.26798	2.37224	2.15896	4.48484	8.33636
	5	1.71636	1.48258	1.48674	2.26768	2.81574	2.13876	4.61406	8.47746
	6	1.48288	1.36554	1.46238	2.1952	2.40076	2.83894	4.6102	8.6551
	7	1.84468	2.14292	1.59546	1.96172	2.56592	3.81738	9.94992	7.2055
	8	1.88894	1.96528	1.91004	2.06658	2.77148	3.86164	10.176	6.98776
	9	1.78794	2.19936	1.56338	2.04638	2.50562	3.06166	10.3206	7.15292
	Mean	1.73065	1.9194	1.799	2.10051	2.72006	2.91436	7.32142	7.56133
	SD	0.166752	0.389654	0.280492	0.128175	0.269179	0.608625	2.41882	0.730513
	SE	0.0555841	0.129885	0.0934975	0.0427251	0.0897262	0.202875	0.806275	0.243504

## Sheet: Carotenoid
					Conc.
		0	25	50	100	200	400	800	1600
	1	0.71282	0.708955	0.725168	0.591327	0.574562	0.430861	1.04629	0.786368
	2	0.667703	0.700978	0.718854	0.56974	0.585369	0.440513	1.10244	0.867804
	3	0.654399	0.784606	0.738858	0.575838	0.666534	0.444118	1.10728	0.777977
	4	0.481309	0.528704	0.287756	0.671074	0.579536	0.920243	0.823682	1.29662
	5	0.421103	0.477475	0.408322	0.669859	0.456059	0.914901	0.786927	1.36816
	6	0.438286	0.497477	0.441829	0.661698	0.547584	0.468503	0.766385	1.22277
	7	0.572621	0.623526	0.425614	0.547568	0.634906	0.780393	1.4918	0.963587
	8	0.573545	0.672955	0.335058	0.519066	0.611701	0.766165	1.47515	1.00355
	9	0.602386	0.582444	0.43824	0.508672	0.564537	1.19071	1.50036	0.989857
	Mean	0.569352	0.61968	0.502189	0.590538	0.580088	0.706267	1.12226	1.03074
	SD	0.10339	0.105743	0.176422	0.0633912	0.0593901	0.274956	0.303867	0.217512
	SE	0.0344634	0.0352475	0.0588073	0.0211304	0.0197967	0.0916521	0.101289	0.0725041

## Sheet: Chl a to chl b ratio
						Conc.
			0	25	50	100	200	400	800	1600
		1	1.53601	1.33267	1.26862	1.04755	1.19755	0.639104	2.32028	2.09256
		2	1.45143	1.62805	1.31766	1.18126	0.678812	0.629912	2.20833	3.54092
		3	1.30989	1.60266	1.45734	1.1082	1.25624	0.629912	2.46901	2.04365
		4	1.03023	1.22362	0.789339	1.12029	1.35144	1.24921	2.03923	2.39727
		5	0.969916	1.03023	0.949826	1.26658	1.15774	1.2826	1.86886	2.33114
		6	0.854942	1.18433	1.06737	1.25516	1.19001	0.405774	1.80212	2.18355
		7	1.31614	1.21095	0.986606	1.17594	1.18699	1.63472	2.55911	2.30946
		8	1.34562	1.47064	0.844195	1.11073	1.13834	1.64907	2.38014	2.4476
		9	1.58804	1.18699	0.902345	1.14014	1.13469	4.69778	2.4454	2.39986
		Mean	1.26691	1.3189	1.06481	1.15621	1.14354	1.42423	2.2325	2.41622
		SD	0.25836	0.205816	0.231798	0.0713435	0.186805	1.31231	0.272223	0.444817
		SE	0.0861199	0.0686052	0.0772661	0.0237812	0.0622682	0.437436	0.0907409	0.148272

## Sheet: Total Chl to carotenoids ratio
						Conc.
			0	25	50	100	200	400	800	1600
		1	2.58744	3.3348	2.98825	3.50185	5.40526	6.47383	6.89438	8.55976
		2	2.67197	3.13077	2.94713	3.33005	5.07461	6.31378	6.64212	8.6526
		3	2.76351	2.74066	2.79618	3.70076	4.45976	6.26252	6.50335	8.99382
		4	2.94638	2.66652	6.3301	3.37963	4.09334	2.34607	5.44487	6.4293
		5	4.07587	3.10504	3.6411	3.38531	6.17407	2.3377	5.86339	6.19626
		6	3.38336	2.74493	3.30983	3.31753	4.38428	6.0596	6.01551	7.07828
		7	3.22147	3.43678	3.7486	3.58261	4.04142	4.89162	6.66975	7.47779
		8	3.29345	2.92038	5.70062	3.98135	4.53078	5.04022	6.89826	6.96307
		9	2.9681	3.77609	3.56741	4.02298	4.43837	2.57129	6.87878	7.22622
		Mean	3.10128	3.09511	3.89214	3.57801	4.73354	4.69963	6.42338	7.50857
		SD	0.458929	0.371108	1.25765	0.27097	0.694327	1.79743	0.525252	1.00437
		SE	0.152976	0.123703	0.419218	0.0903232	0.231442	0.599144	0.175084	0.334791
